# Supplementary material
Source: PubMed Central journal article supplement (PMC3063962)

### Supplemental Figure I

#### A. HEK-293-T cells plated on fibronectin or BSA

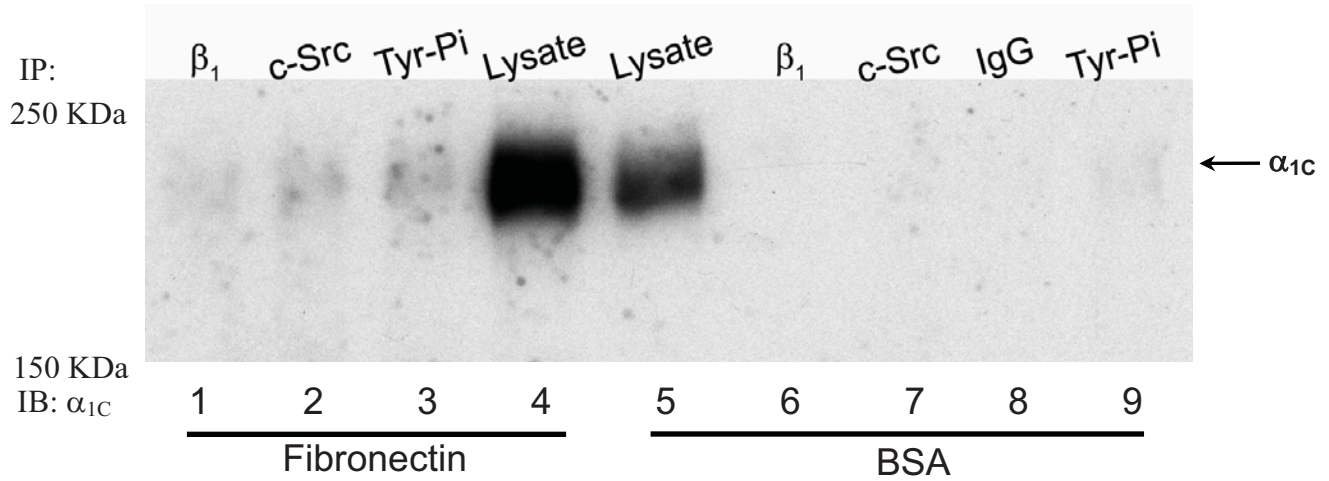

#### B. Arteriolar smooth muscle

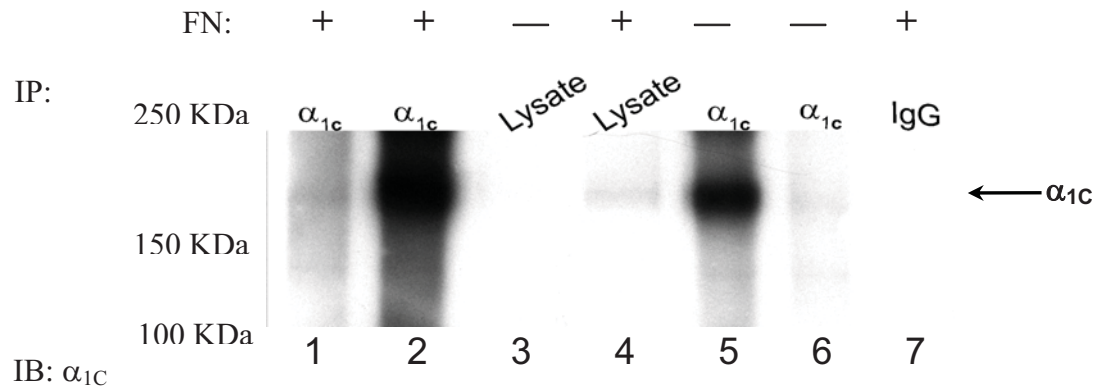

Supplement: supp_00171.2010_figS1.pdf [file supp_00171.2010_figS1.pdf]

## Supplemental Figure II

### A. HEK-293-T cells plated on fibronectin

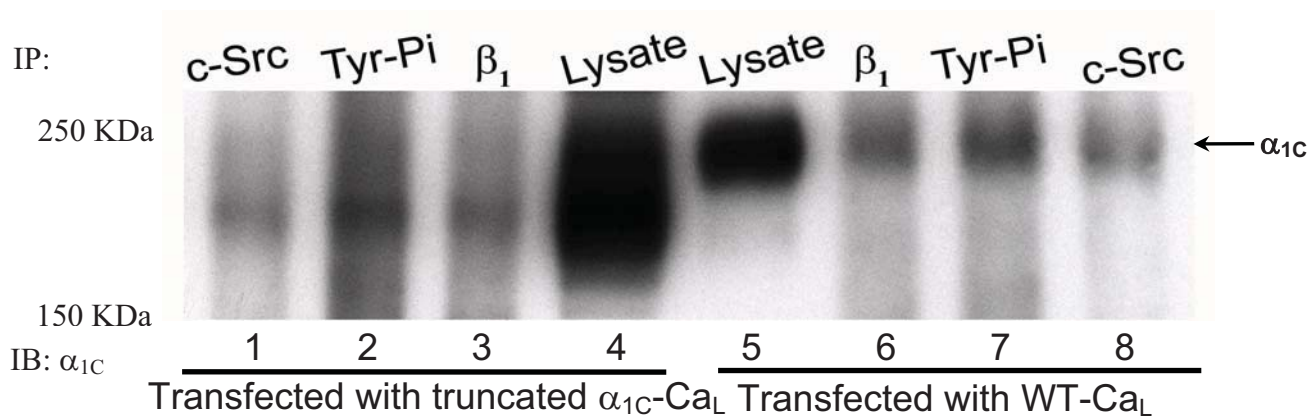

### B. HEK-293-T cells plated on fibronectin

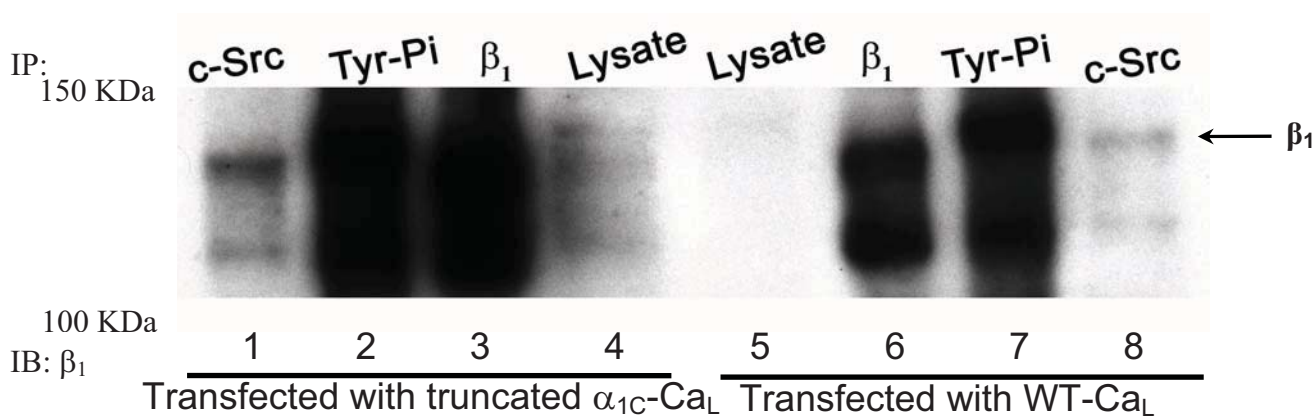

### C.

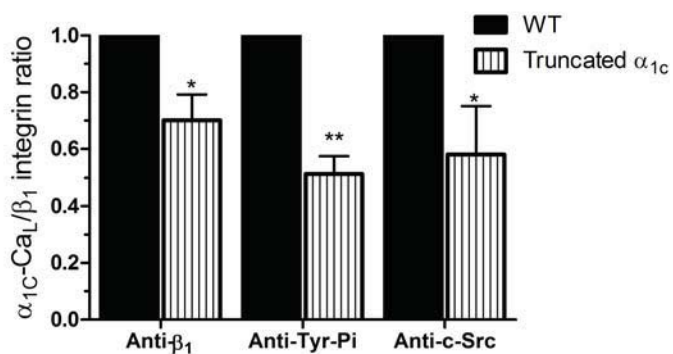

Supplement: supp_00171.2010_figS2.pdf [file supp_00171.2010_figS2.pdf]

### Supplemental Figure III

#### A. HEK-293-T cells plated on fibronectin

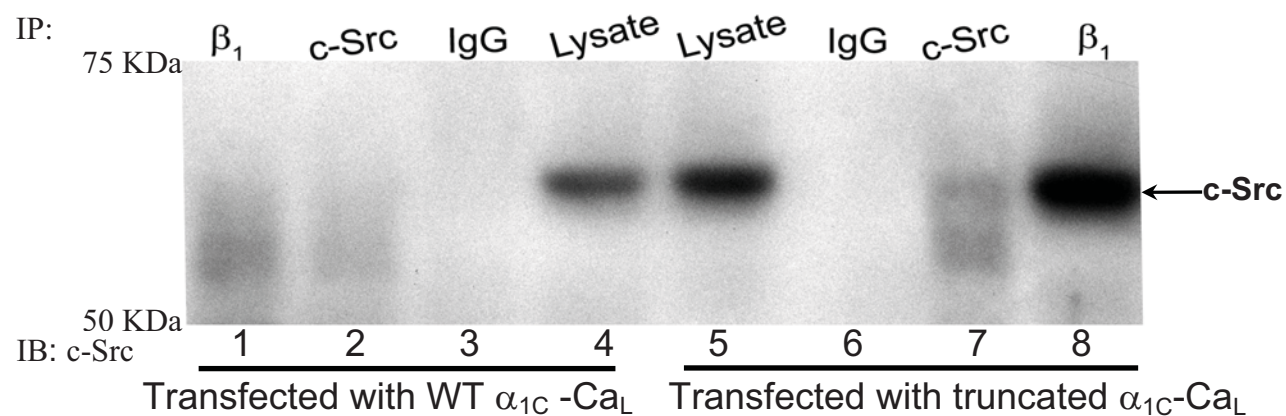

#### B. HEK-293-T cells plated on fibronectin

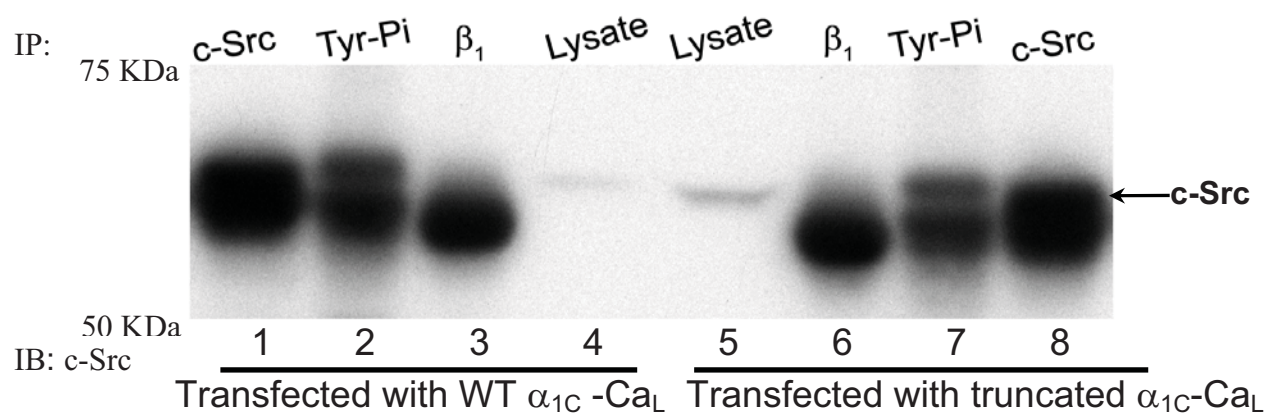

Supplement: supp_00171.2010_figS3.pdf [file supp_00171.2010_figS3.pdf]

### Supplemental Figure IV

#### A. HEK-293-T cells plated on fibronectin

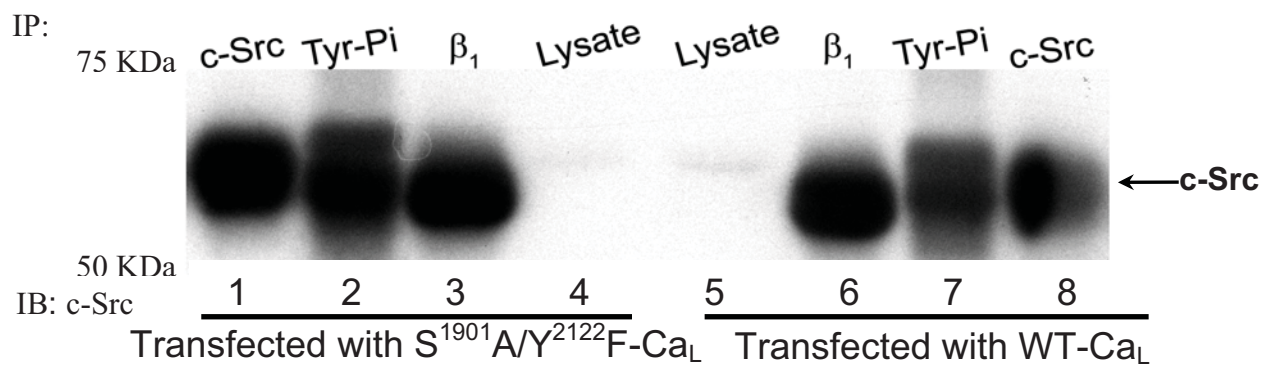

#### B. HEK-293-T cells plated on fibronectin

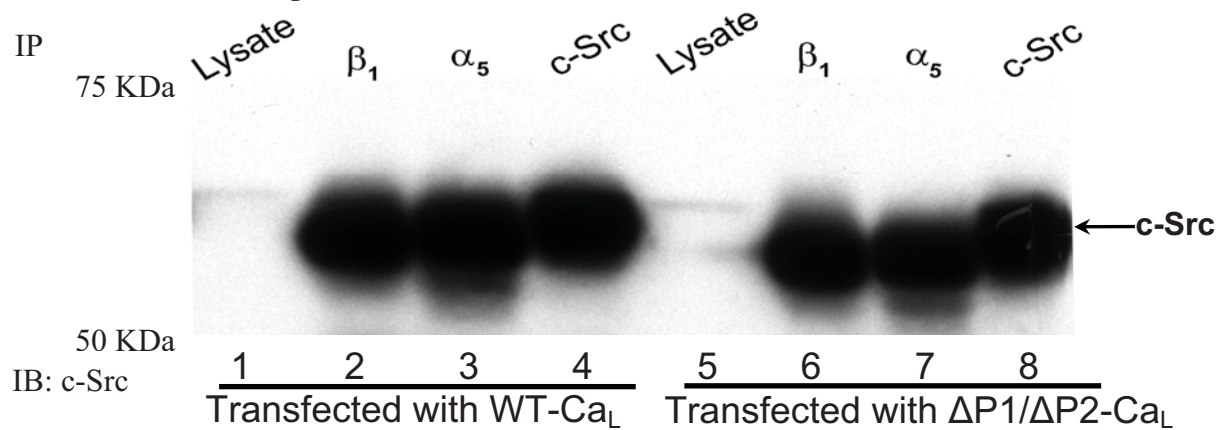

Supplement: supp_00171.2010_figS4.pdf [file supp_00171.2010_figS4.pdf]
